# Supplementary material
Source: Research Square preprint supplement (doi:10.21203/rs.3.rs-8670860/v1)
Supplement: Supplementary file 1 [file 6038eb6fba8c9e8ce94f54f0.docx]

**The Occupational Health and Safety Awareness Level Scale**

|  | **Strongly Disagree** | **Disagree** | **Undecided** | **Agree** | **Strongly Agree** |
| --- | --- | --- | --- | --- | --- |
| 1.Employees receive Basic Occupational Health and Safety Training as soon as possible after starting work. |  |  |  |  |  |
| 2. The workplace I work in is classified as a “very hazardous” workplace. |  |  |  |  |  |
| 3. Considering the workplace hazard class, the nature of the work, the results of the risk assessment, and employee‑related personal factors, periodic medical examinations for employees are repeated at least once a year. |  |  |  |  |  |
| 4. Occupational Health and Safety Trainings for employees are repeated at least once a year in accordance with the workplace hazard class (very hazardous), taking into account emerging and newly identified risks. |  |  |  |  |  |
| 5. In accordance with the workplace hazard class (very hazardous), the risk assessment is renewed at least once every two years. |  |  |  |  |  |
| 6. I participate in the risk assessment process at every stage where my involvement is needed. |  |  |  |  |  |
| 7. I know that I must inform the relevant personnel if I experience a work accident. |  |  |  |  |  |
| 8. I have knowledge about the personal protective equipment that must be used in my department. |  |  |  |  |  |
| 9. Necessary precautions are taken against the risks identified in my department during the risk assessment process. |  |  |  |  |  |
| 10. The activities and work organization in the workplace are arranged in a way that prevents employees from having work accidents. |  |  |  |  |  |
| 11. I am knowledgeable about my responsibilities as an employee in the field of Occupational Health and Safety. |  |  |  |  |  |
| 12. I am aware that I must report near‑miss incidents to the relevant unit. |  |  |  |  |  |
| 13. Training needs related to Occupational Health and Safety are identified individually for each employee. |  |  |  |  |  |
| 14. I know the safety data sheets of the chemicals used in my department. |  |  |  |  |  |
| 15. I know the components that form the fire triangle. |  |  |  |  |  |
| 16. I am aware that fire types are classified according to the burning material as Class A, Class B, Class C, and Class D fires. |  |  |  |  |  |
| 17. I know how to respond to a fire according to its class. |  |  |  |  |  |
| 18. Different types of fire extinguishers are available in areas depending on the potential type of fire. |  |  |  |  |  |
| 19. I know the locations of the fire extinguishers in my work area. |  |  |  |  |  |
| 20. Fire extinguishers are regularly inspected by authorized personnel. |  |  |  |  |  |
| 21. The emergency color code for an internal hospital fire is red. |  |  |  |  |  |
| 22. I know the internal emergency number I should call in case of a fire. |  |  |  |  |  |
| 23. I know the external emergency number I should call in case of a fire. |  |  |  |  |  |
| 24. I regularly receive training related to fire safety. |  |  |  |  |  |
| 25. There are emergency response teams (firefighting, rescue, protection, first aid) in my workplace. |  |  |  |  |  |
| 26. I know that the principle of fire response is “Give Alarm, Rescue, Control, Evacuate/Escape.” |  |  |  |  |  |
| 27. When a fire alarm is activated, the Incident Management Team is mobilized. |  |  |  |  |  |
| 28. There are written and visual signs indicating the locations of medical gas shut‑off valves. |  |  |  |  |  |
| 29. I am knowledgeable about the fire safety procedures in my workplace. |  |  |  |  |  |
| 30. I know of the fire detection and alarm systems in my workplace. |  |  |  |  |  |
| 31. I am knowledgeable about the emergency plans of my workplace. |  |  |  |  |  |
| 32. Regular drills are conducted in my workplace as part of disaster and emergency preparedness activities. |  |  |  |  |  |
| 33. I regularly receive training on disasters and emergencies. |  |  |  |  |  |
| 34. A purple code is announced for the activation of the emergency response plan. |  |  |  |  |  |
| 35. There is an organizational chart established within the scope of the Hospital Disaster and Emergency Plan. |  |  |  |  |  |
| 36. The Hospital Disaster and Emergency Plan is updated at the beginning of each year by the Hospital Disaster and Emergency Plan preparation committee. |  |  |  |  |  |
| 37. Activities related to reducing non‑structural risks are carried out regularly. |  |  |  |  |  |
| 38. I know the location of hospital disaster triage areas. |  |  |  |  |  |
| 39. Evacuation methods are divided into two types: internal evacuation (moving patients to other safe areas within the hospital) and external evacuation (moving patients to a safe area outside the hospital). |  |  |  |  |  |
| 40. I am knowledgeable about the evacuation plan of my workplace. |  |  |  |  |  |
| 41. I know evacuation triage. |  |  |  |  |  |
| 42. A yellow code is announced for situations requiring evacuation in the hospital. |  |  |  |  |  |
| 43. I know the emergency exits in my work area. |  |  |  |  |  |
| 44. I know the location of the designated assembly area. |  |  |  |  |  |
